# Supplementary material for: Dynamic allometry in coastal overwash morphology
Source: Copernicus journal article supplement (doi:10.5194/esurf-8-37-2020), 2020-01-21
Supplement: Supplementary file 1 [file esurf-8-37-2020-supplement.pdf]

Supplement of Earth Surf. Dynam., 8, 37–50, 2020  
<https://doi.org/10.5194/esurf-8-37-2020-supplement>  
© Author(s) 2020. This work is distributed under  
the Creative Commons Attribution 4.0 License.

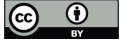

*Supplement of*

## **Dynamic allometry in coastal overwash morphology**

**Eli D. Lazarus et al.**

*Correspondence to:* Eli D. Lazarus (e.d.lazarus@soton.ac.uk)

The copyright of individual parts of the supplement might differ from the CC BY 4.0 License.

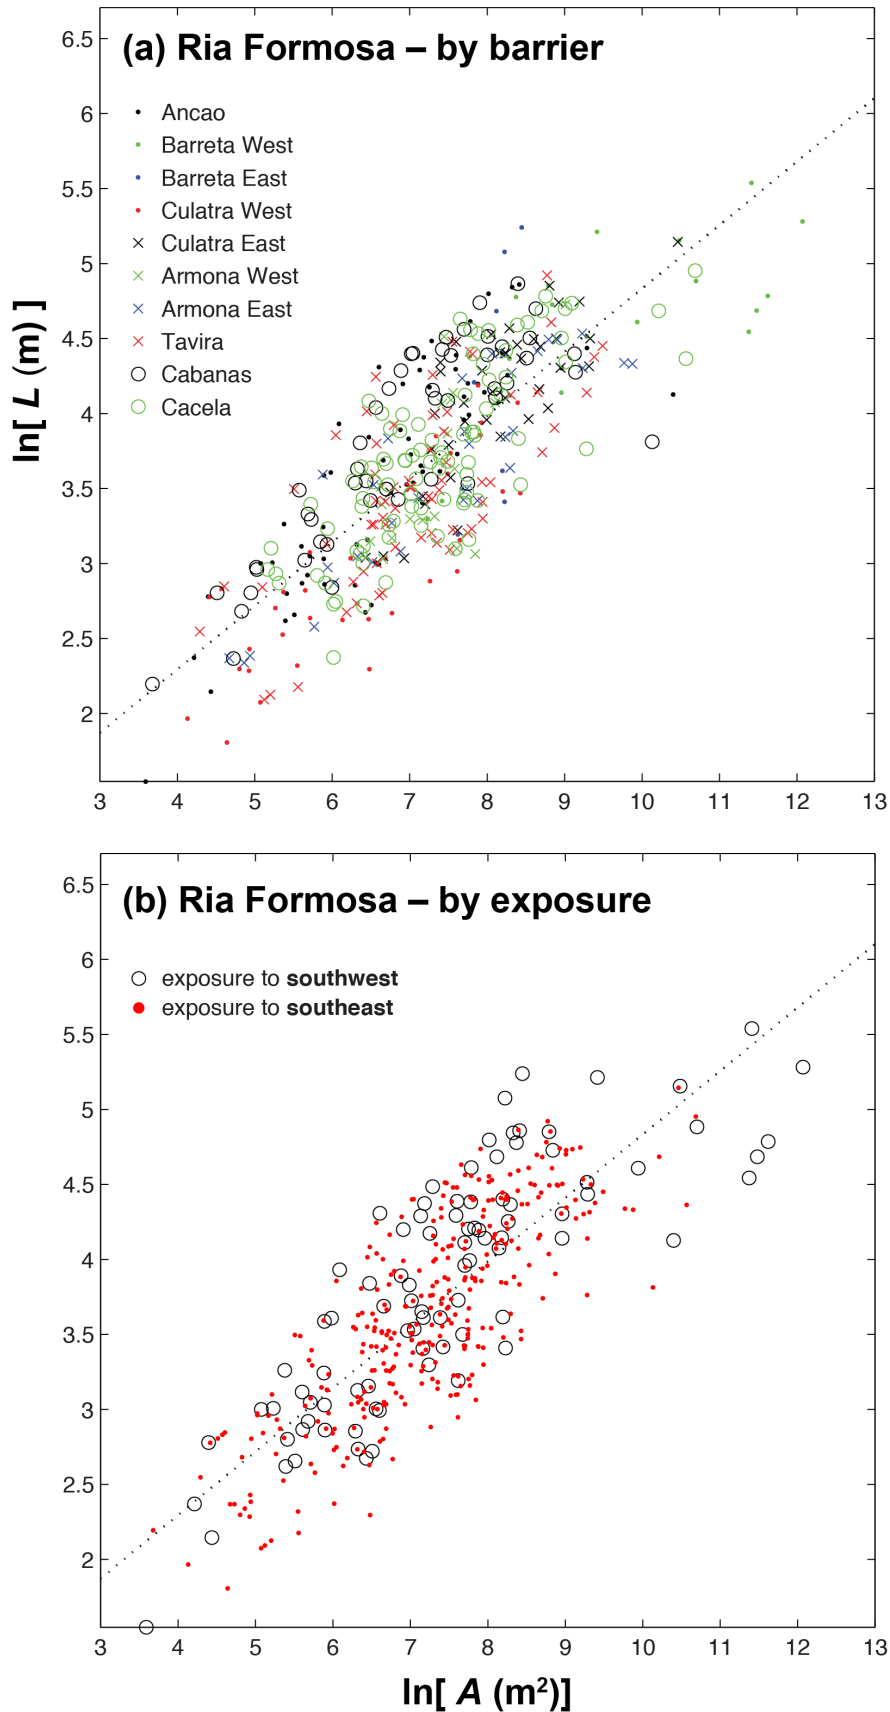

13

14 **Figure S1.** Just as no image year dominates the overall pattern of the Ria Formosa data  
 15 (Fig. 2), nor does **(a)** any single barrier in the compilation or **(b)** barrier aspect of  
 16 exposure to open ocean (to southwest or southeast).

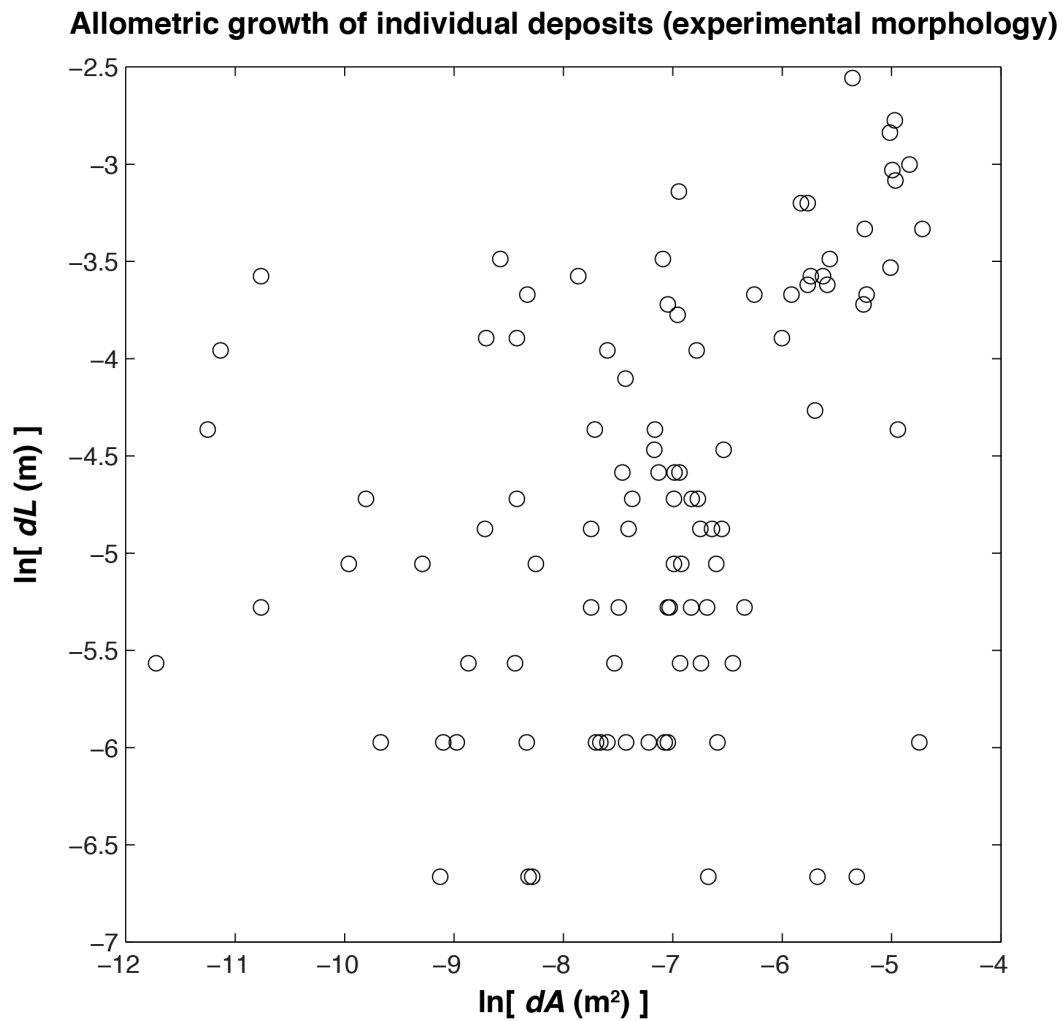

18

19 **Figure S2.** Log-transform plot of allometric growth (*change* in washover length  $L$  versus  
 20 *change* in washover area  $A$ ), from the time series tracking morphometry of individual  
 21 experimental washovers (see also Fig. 5a). Although we find evidence of dynamic  
 22 allometry in this experiment, we see no pattern of allometric growth, consistent with the  
 23 concept that characteristics associated with equilibrium or steady-state may manifest at a  
 24 landscape scale but not necessarily at a landform scale.
